# Supplementary material for: Cyclo[18]carbon including zero-point motion: ground state, first singlet and triplet excitations, and hole transfer
Source: Royal Society of Chemistry journal article supplement (doi:10.1039/d2cp00343k), 2022-01-01
Supplement: d2cp00343k2.pdf [file d2cp00343k2.pdf]

## Electronic Supplementary Information for: Cyclo[18]carbon including Zero-Point Motion: Ground State, First Singlet and Triplet Excitations, and Hole Transfer

Konstantinos Lambropoulos<sup>\*,a</sup>, Antonios M. Alvertis<sup>b,c</sup>, Andreas Morphis<sup>a</sup>, and Constantinos Simserides<sup>a</sup>

<sup>a</sup>Department of Physics, National and Kapodistrian University of Athens, Panepistimiopolis, Zografos GR-15784, Athens, Greece. Email: klambro@phys.uoa.gr, amorphis@phys.uoa.gr, csimseri@phys.uoa.gr

<sup>b</sup>Cavendish Laboratory, University of Cambridge, J. J. Thomson Avenue, Cambridge CB3 0HE, United Kingdom. Email: ama80@cam.ac.uk

<sup>c</sup>Materials Sciences Division, Lawrence Berkeley National Laboratory, Berkeley, California 94720, USA.

### Additional Figures

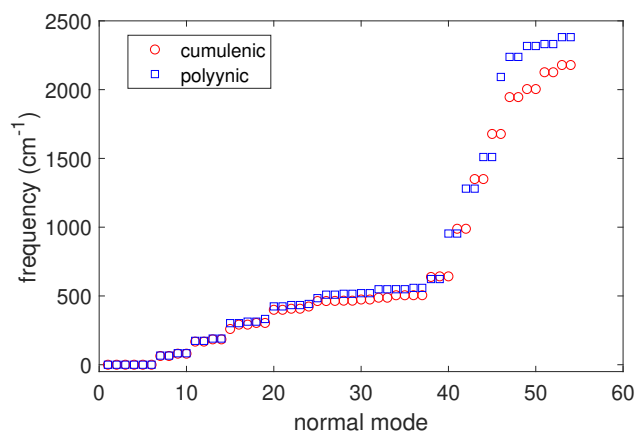

Figure S1: Vibrational analysis of cumulenic (empty red circles) and polyynic (empty blue squares) cyclo[18]carbon, with the cc-pVTZ basis set.

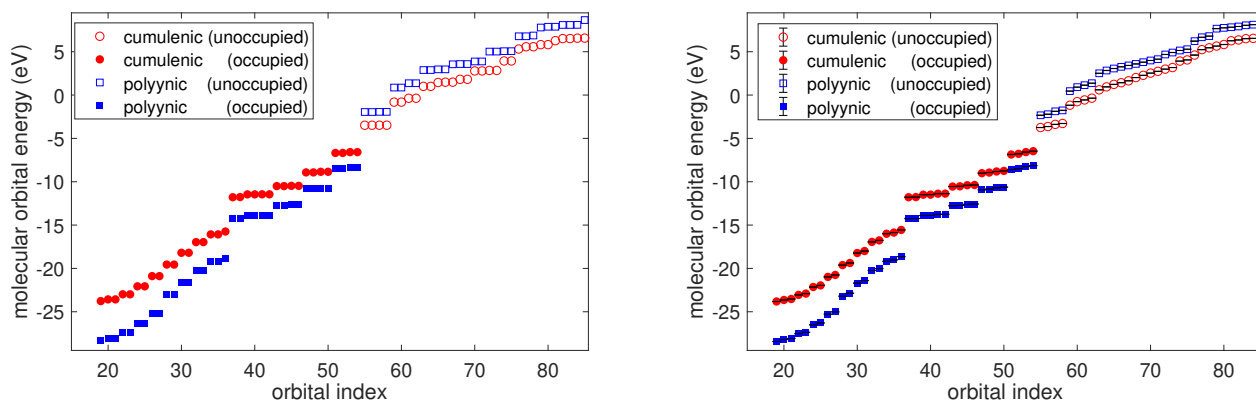

Figure S2: Energies of several occupied (filled shapes) and unoccupied (empty shapes) orbitals of cumulenic (red circles) and polyynic (blue squares) cyclo[18]carbon. (Left) Static conformations. (Right) Averaged values of the Monte Carlo sample, accounting for zero-point vibrations, including standard errors.

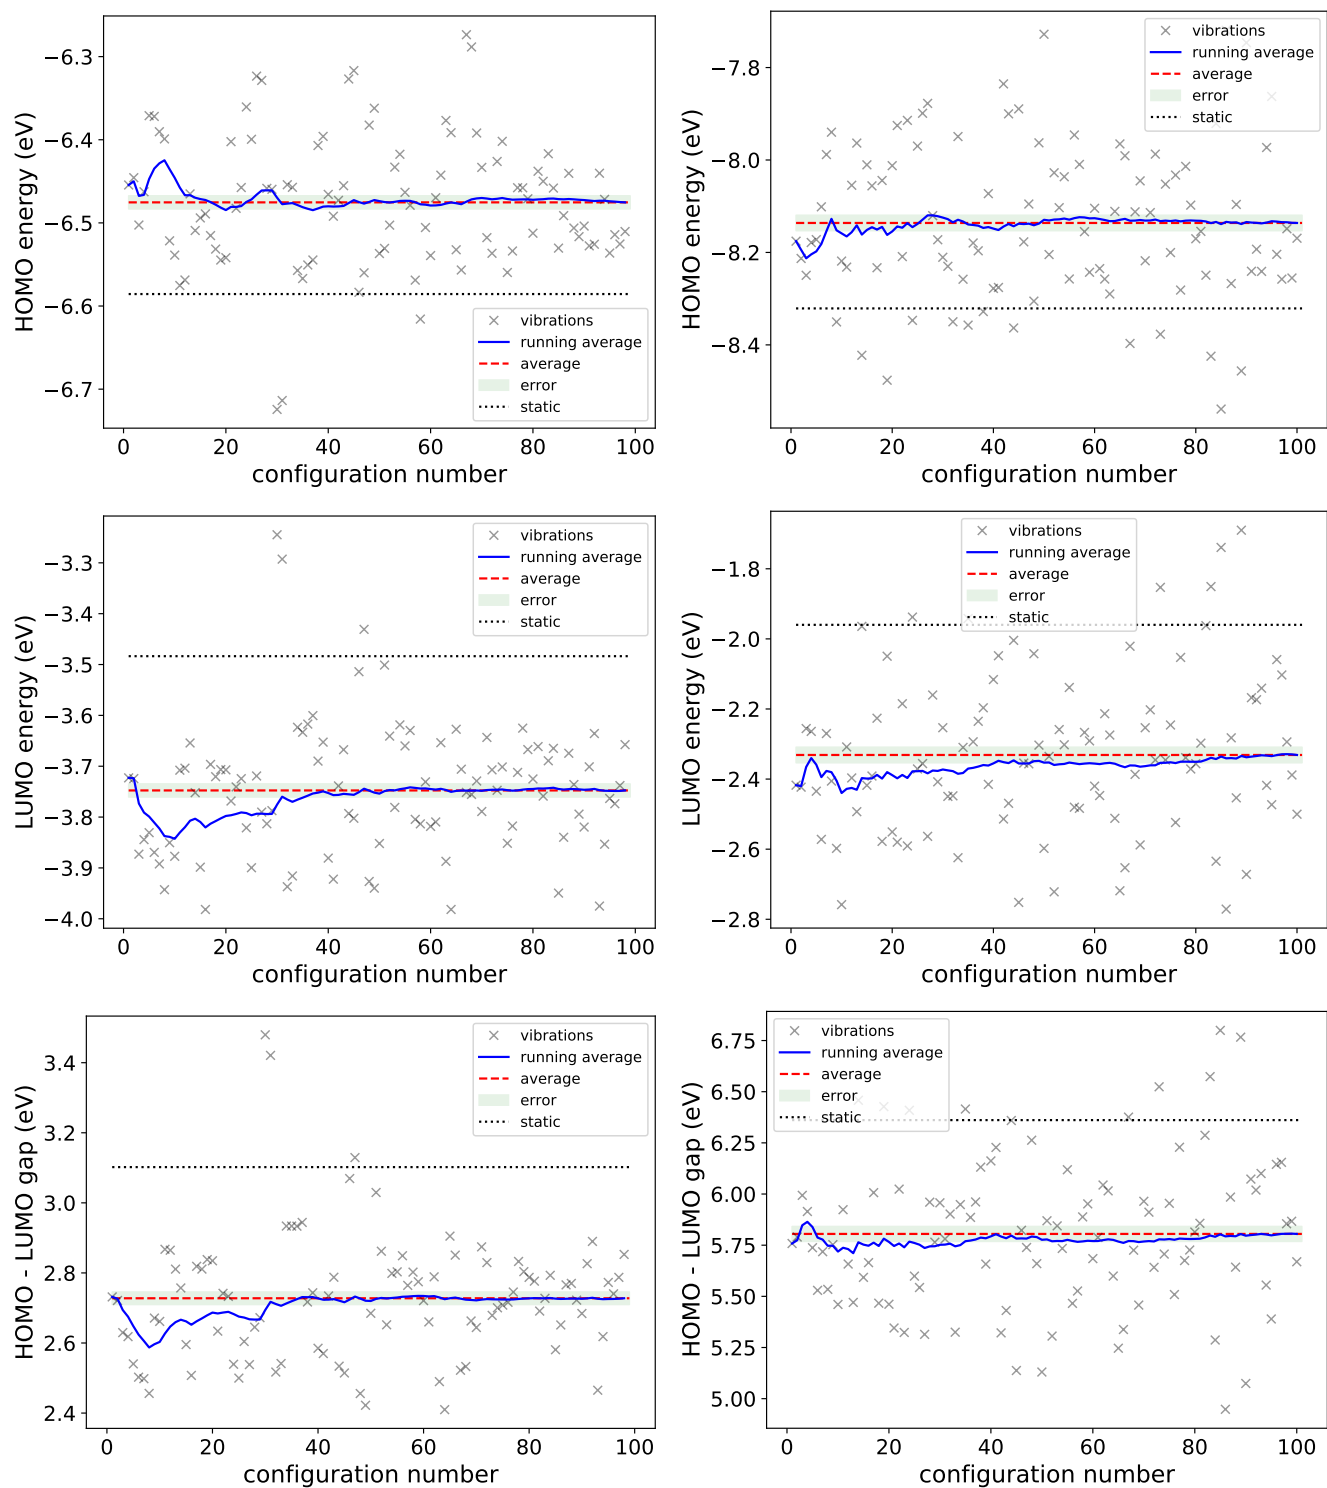

Figure S3: Comparison of the HOMO energy (first row), LUMO energy (second row), and HOMO-LUMO gap (third row) of static cumulenyl (left column) and polynic (right column) cyclo[18]carbon with their corresponding renormalized values due to zero-point vibrations, using the Monte Carlo method. The values for each Monte Carlo configuration and the running averages are also shown.

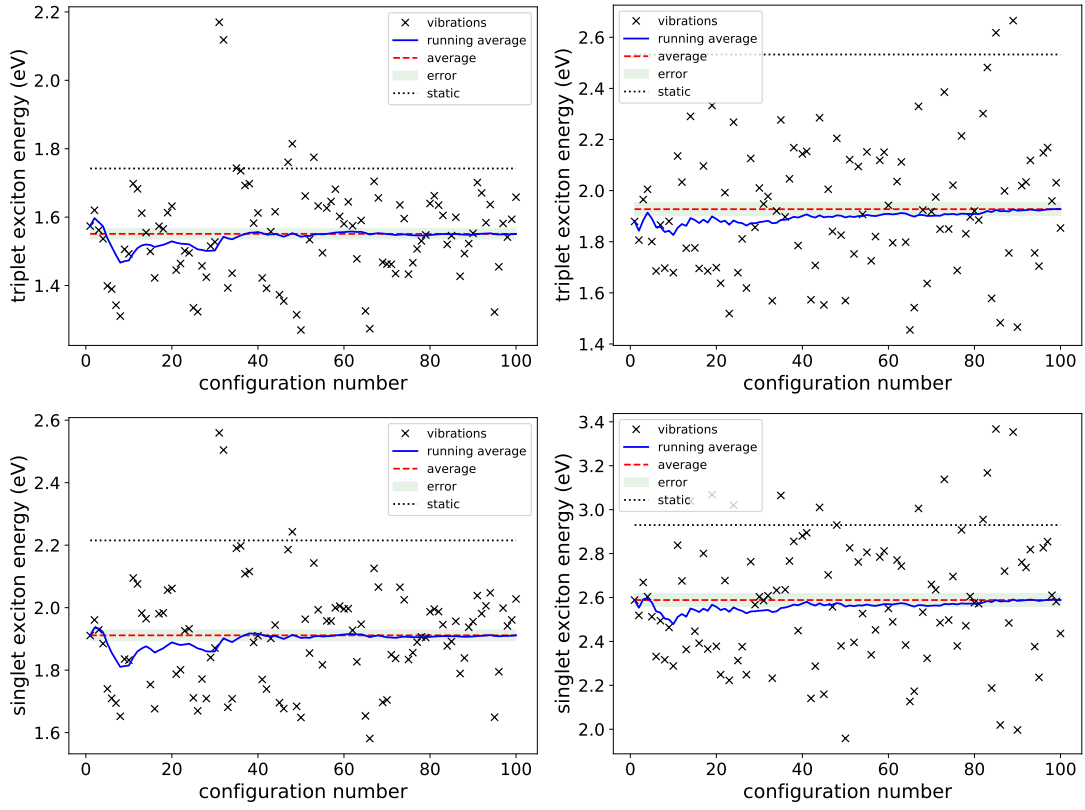

Figure S4: Comparison of the first triplet (first row) and first singlet (second row) excitation energies of static cumulenic (left column) and polynic (right column) cyclo[18]carbon with their corresponding renormalized values due to zero-point vibrations, using the Monte Carlo method. The values for each Monte Carlo sample and the running averages are also shown.

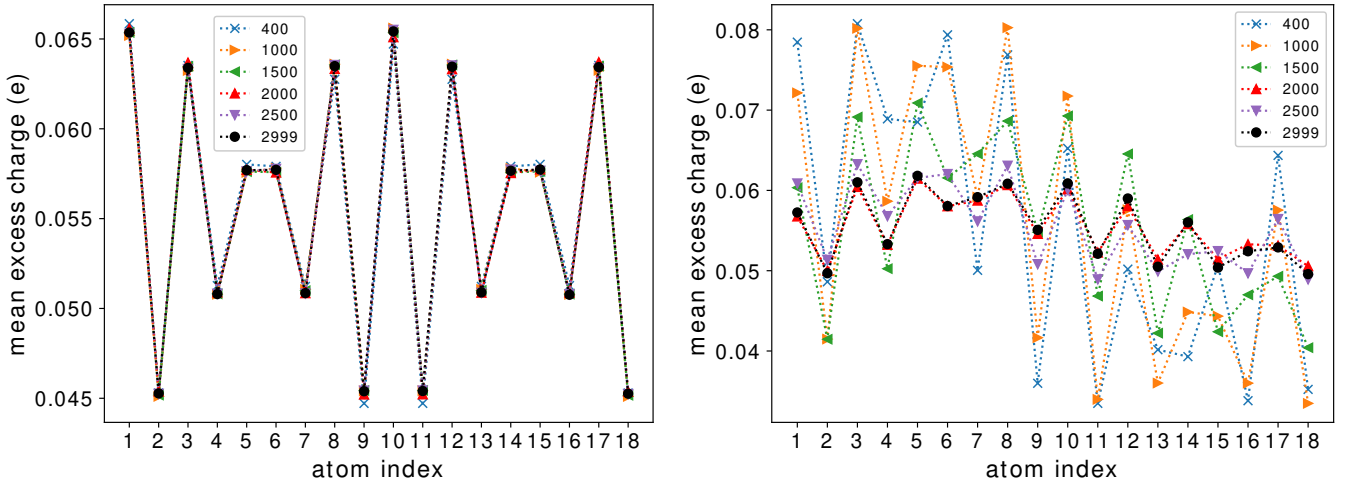

Figure S5: Time-convergence of the mean excess charge distribution of static cumulenic (left) and polynic (right) cyclo[18]carbon. Time intervals are specified in the legend, in atomic units. Dotted lines are guide for the eye.

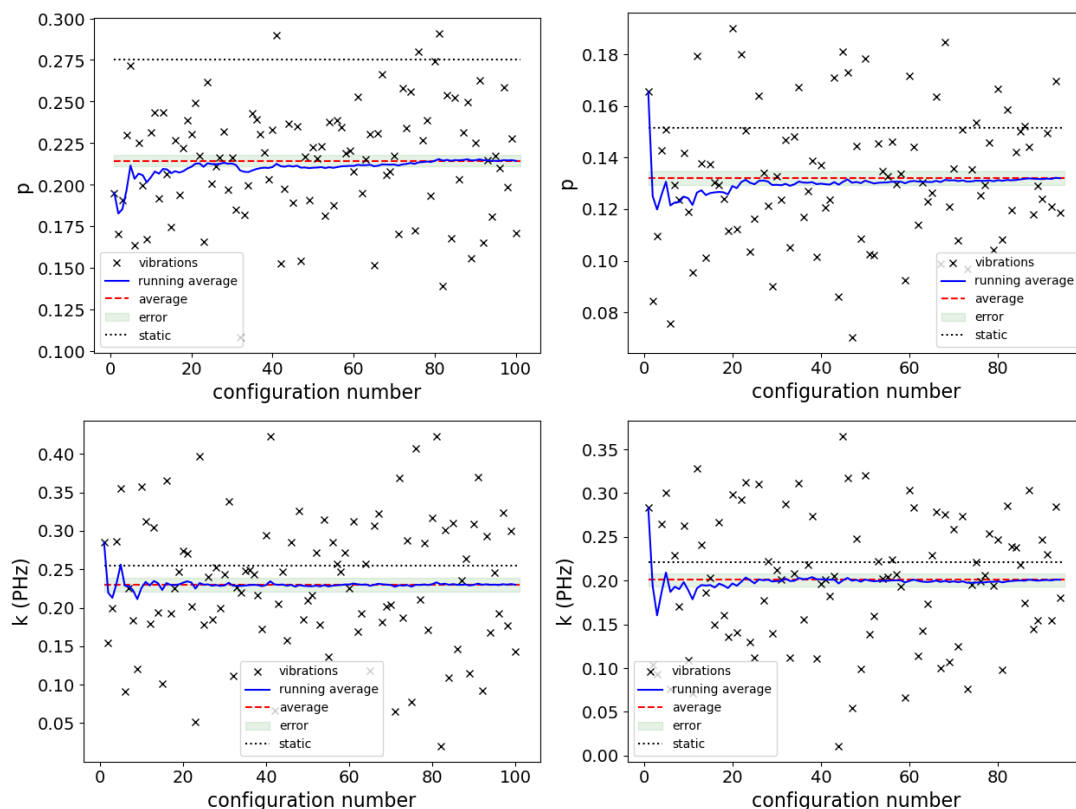

Figure S6: Comparison of the maximum value of excess charge,  $p$ , at the diametrically opposed atom to the one the hole was initially placed (first row) and the mean transfer rate,  $k$ , (second row) of static cumulenenic (left column) and polyyenic (right column) cyclo[18]carbon with their corresponding renormalized values due to zero-point vibrations, using the Monte Carlo method. The values for each sample and the running averages are also shown.

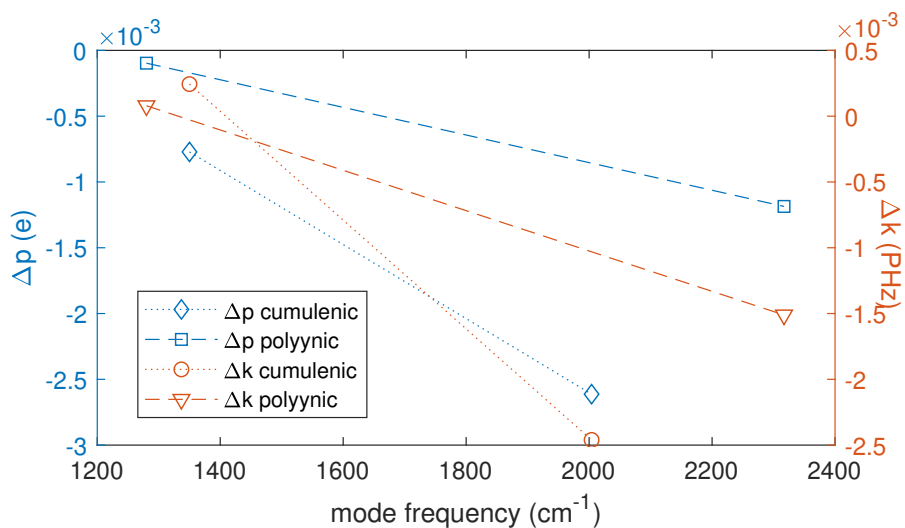

Figure S7: Contribution of the modes at  $\approx 2004 \text{ cm}^{-1}$  ( $\approx 2317 \text{ cm}^{-1}$ ) and  $\approx 1350 \text{ cm}^{-1}$  ( $\approx 1280 \text{ cm}^{-1}$ ) which display major and minor contributions, respectively, on the HOMO-LUMO gaps, and  $T_1$  and  $S_1$  excitation energies [cf, Fig. 2(d)-(e) of the main text], for cumulenenic (polyyenic) cyclo[18]carbon, within the quadratic method.
